# Supplementary material
Source: HighWire-hosted journal article supplement (https://www.ghspjournal.org/highwire/filestream/1585/field_highwire_adjunct_files/1/15-00093-Gray-Supplementary-Table-A.docx)
Supplement: 15-00093-Gray-Supplementary-Table-A.docx [file 15-00093-Gray-Supplementary-Table-A.docx]

**SUPPLEMENTAL TABLE A.** Specific Items Included in Each Trauma Category

| **Category** | **Items in Categorya** |
| --- | --- |
| Disaster or accidents | 1. Been in a big earthquake that damaged the building I was in. |
|  | 1. Been in another disaster, like a fire, tornado, flood, hurricane, tsunami, big storm. |
|  | 1. Been in a bad accident, like a car accident. |
| War, riots, killings | 1. Been in a place where war, conflict, fighting, or riots were going on. |
|  | 1. Saw someone in the town shot at or killed. |
|  | 1. Seen someone hurt or killed during a war. |
| Physical or sexual abuse | 1. Been hit, kicked, or beaten at home. |
|  | 1. Been hit, kicked, or beaten by other children. |
|  | 1. Someone touched my private sexual parts when I did not want them to. |
|  | 1. I was raped or sexually molested. |
| Violence in family or care setting | 1. Saw a family member hit, kicked, or beaten. |
|  | 1. Saw a family member shot at or killed. |
|  | 1. I saw a family member raped or sexually molested. |
| Witnessing a family death | 1. Saw a family member die a violent death or be seriously injured. |
|  | 1. Seen a family member die from illness. |
| Forced to leave home or care setting | 1. Was forced to move or run from home due to a war, conflict, fighting. |
|  | 1. Was forced to move from home because there was no one (adult) there to stay with. |

Each item was presented to the child as a question about whether experience had happened to the child.
